# Supplementary material for: The characteristic landscape of lncRNAs classified by RBP–lncRNA interactions across 10 cancers
Source: Royal Society of Chemistry journal article supplement (doi:10.1039/c7mb00144d), 2017-03-31
Supplement: c7mb00144d1.xlsx [file c7mb00144d1.xlsx]

## Sheet: Table S11
Table S11 The KEGG pathway enrichment of Rlncs
Cancer Types	Category	Term	PValue
THCA	KEGG_PATHWAY	hsa05205:Proteoglycans in cancer	0.000174785
THCA	KEGG_PATHWAY	hsa05200:Pathways in cancer	0.00218022
THCA	KEGG_PATHWAY	hsa04550:Signaling pathways regulating pluripotency of stem cells	0.00995216
THCA	KEGG_PATHWAY	hsa04512:ECM-receptor interaction	0.0155406
THCA	KEGG_PATHWAY	hsa04151:PI3K-Akt signaling pathway	0.0169901
THCA	KEGG_PATHWAY	hsa04510:Focal adhesion	0.0355085
THCA	KEGG_PATHWAY	hsa05217:Basal cell carcinoma	0.0437256
THCA	KEGG_PATHWAY	hsa04514:Cell adhesion molecules (CAMs)	0.0545072
THCA	KEGG_PATHWAY	hsa04918:Thyroid hormone synthesis	0.0671935
THCA	KEGG_PATHWAY	hsa05100:Bacterial invasion of epithelial cells	0.0810792
THCA	KEGG_PATHWAY	hsa04925:Aldosterone synthesis and secretion	0.0864998
HNSC	KEGG_PATHWAY	hsa04512:ECM-receptor interaction	0.00182207
HNSC	KEGG_PATHWAY	hsa04510:Focal adhesion	0.00778141
HNSC	KEGG_PATHWAY	hsa05222:Small cell lung cancer	0.0146028
HNSC	KEGG_PATHWAY	hsa04151:PI3K-Akt signaling pathway	0.0169901
HNSC	KEGG_PATHWAY	hsa05130:Pathogenic Escherichia coli infection	0.0381159
HNSC	KEGG_PATHWAY	hsa04810:Regulation of actin cytoskeleton	0.0382734
HNSC	KEGG_PATHWAY	hsa04110:Cell cycle	0.03898
HNSC	KEGG_PATHWAY	hsa04360:Axon guidance	0.0413848
HNSC	KEGG_PATHWAY	hsa05100:Bacterial invasion of epithelial cells	0.0810792
HNSC	KEGG_PATHWAY	hsa05200:Pathways in cancer	0.0878999
KICH	KEGG_PATHWAY	hsa00230:Purine metabolism	0.0269206
KICH	KEGG_PATHWAY	hsa04961:Endocrine and other factor-regulated calcium reabsorption	0.0343906
KICH	KEGG_PATHWAY	hsa04810:Regulation of actin cytoskeleton	0.0475088
KICH	KEGG_PATHWAY	hsa05166:HTLV-I infection	0.0839899
KICH	KEGG_PATHWAY	hsa04022:cGMP-PKG signaling pathway	0.0929488
KICH	KEGG_PATHWAY	hsa04925:Aldosterone synthesis and secretion	0.0972839
KIRP	KEGG_PATHWAY	hsa04510:Focal adhesion	0.00178888
KIRP	KEGG_PATHWAY	hsa04350:TGF-beta signaling pathway	0.00190554
KIRP	KEGG_PATHWAY	hsa05200:Pathways in cancer	0.0112565
KIRP	KEGG_PATHWAY	hsa04550:Signaling pathways regulating pluripotency of stem cells	0.0117015
KIRP	KEGG_PATHWAY	hsa05222:Small cell lung cancer	0.0165541
KIRP	KEGG_PATHWAY	hsa04512:ECM-receptor interaction	0.0176098
KIRP	KEGG_PATHWAY	hsa05202:Transcriptional misregulation in cancer	0.0215006
LIHC	KEGG_PATHWAY	hsa04510:Focal adhesion	0.0495001
LUAD	KEGG_PATHWAY	hsa04512:ECM-receptor interaction	0.000347548
LUAD	KEGG_PATHWAY	hsa04145:Phagosome	0.000680533
LUAD	KEGG_PATHWAY	hsa04510:Focal adhesion	0.00313245
LUAD	KEGG_PATHWAY	hsa05202:Transcriptional misregulation in cancer	0.0305841
LUAD	KEGG_PATHWAY	hsa04151:PI3K-Akt signaling pathway	0.0339059
LUAD	KEGG_PATHWAY	hsa05200:Pathways in cancer	0.057712
LUAD	KEGG_PATHWAY	hsa05412:Arrhythmogenic right ventricular cardiomyopathy (ARVC)	0.0899212
LUSC	KEGG_PATHWAY	hsa04512:ECM-receptor interaction	0.00085796
LUSC	KEGG_PATHWAY	hsa04390:Hippo signaling pathway	0.0014142
LUSC	KEGG_PATHWAY	hsa04510:Focal adhesion	0.00356384
LUSC	KEGG_PATHWAY	hsa05200:Pathways in cancer	0.0097506
LUSC	KEGG_PATHWAY	hsa05202:Transcriptional misregulation in cancer	0.0298942
LUSC	KEGG_PATHWAY	hsa04520:Adherens junction	0.0372495
LUSC	KEGG_PATHWAY	hsa04151:PI3K-Akt signaling pathway	0.0428159
LUSC	KEGG_PATHWAY	hsa04919:Thyroid hormone signaling pathway	0.052176
LUSC	KEGG_PATHWAY	hsa04350:TGF-beta signaling pathway	0.0622024
LUSC	KEGG_PATHWAY	hsa05222:Small cell lung cancer	0.0644138
LUSC	KEGG_PATHWAY	hsa05205:Proteoglycans in cancer	0.0653918
LUSC	KEGG_PATHWAY	hsa05217:Basal cell carcinoma	0.0740779
LUSC	KEGG_PATHWAY	hsa04340:Hedgehog signaling pathway	0.0826616
LUSC	KEGG_PATHWAY	hsa04320:Dorso-ventral axis formation	0.0826616
LUSC	KEGG_PATHWAY	hsa05166:HTLV-I infection	0.0855553
LUSC	KEGG_PATHWAY	hsa04144:Endocytosis	0.0885482
LUSC	KEGG_PATHWAY	hsa05210:Colorectal cancer	0.0978426

## Sheet: Table S12
Table S12 The KEGG pathway enrichment of NRlncs
Cancer Types	Category	Term	PValue
THCA	KEGG_PATHWAY	hsa05205:Proteoglycans in cancer	0.00205805
THCA	KEGG_PATHWAY	hsa04510:Focal adhesion	0.00234285
THCA	KEGG_PATHWAY	hsa05100:Bacterial invasion of epithelial cells	0.00542361
THCA	KEGG_PATHWAY	hsa05206:MicroRNAs in cancer	0.00929128
THCA	KEGG_PATHWAY	hsa05202:Transcriptional misregulation in cancer	0.0418192
HNSC	KEGG_PATHWAY	hsa04360:Axon guidance	0.00137623
HNSC	KEGG_PATHWAY	hsa04151:PI3K-Akt signaling pathway	0.00179692
HNSC	KEGG_PATHWAY	hsa04512:ECM-receptor interaction	0.00453286
HNSC	KEGG_PATHWAY	hsa04510:Focal adhesion	0.00785947
HNSC	KEGG_PATHWAY	hsa05100:Bacterial invasion of epithelial cells	0.0368019
HNSC	KEGG_PATHWAY	hsa05205:Proteoglycans in cancer	0.0419481
KICH	KEGG_PATHWAY	hsa05100:Bacterial invasion of epithelial cells	0.0419597
KICH	KEGG_PATHWAY	hsa05205:Proteoglycans in cancer	0.0502621
KICH	KEGG_PATHWAY	hsa04510:Focal adhesion	0.0540399
KICH	KEGG_PATHWAY	hsa04670:Leukocyte transendothelial migration	0.0870967
KIRP	KEGG_PATHWAY	hsa00650:Butanoate metabolism	0.000551857
KIRP	KEGG_PATHWAY	hsa05412:Arrhythmogenic right ventricular cardiomyopathy (ARVC)	0.0688814
KIRP	KEGG_PATHWAY	hsa04512:ECM-receptor interaction	0.0976582
LIHC	KEGG_PATHWAY	hsa00140:Steroid hormone biosynthesis	0.0227592
LIHC	KEGG_PATHWAY	hsa03320:PPAR signaling pathway	0.02977
LIHC	KEGG_PATHWAY	hsa01100:Metabolic pathways	0.0475726
LUAD	KEGG_PATHWAY	hsa01100:Metabolic pathways	0.027532
LUAD	KEGG_PATHWAY	hsa04151:PI3K-Akt signaling pathway	0.0390691
LUAD	KEGG_PATHWAY	hsa00140:Steroid hormone biosynthesis	0.0401335
LUAD	KEGG_PATHWAY	hsa04512:ECM-receptor interaction	0.0823095
LUAD	KEGG_PATHWAY	hsa04974:Protein digestion and absorption	0.0839397
LUSC	KEGG_PATHWAY	hsa05205:Proteoglycans in cancer	0.0249566
LUSC	KEGG_PATHWAY	hsa00140:Steroid hormone biosynthesis	0.0273891
LUSC	KEGG_PATHWAY	hsa04390:Hippo signaling pathway	0.0274815
LUSC	KEGG_PATHWAY	hsa00980:Metabolism of xenobiotics by cytochrome P450	0.05068
LUSC	KEGG_PATHWAY	hsa00040:Pentose and glucuronate interconversions	0.0619205
LUSC	KEGG_PATHWAY	hsa04550:Signaling pathways regulating pluripotency of stem cells	0.0730515
LUSC	KEGG_PATHWAY	hsa00983:Drug metabolism - other enzymes	0.0947353

## Sheet: Table S13
Table S13 Prognosis-related Rlncs across 10 cancer types
lncRNA	number	Cancer Type	P Value
ENSG00000226696.1	3	BLCA,KIRC,LUSC	0.020013	0.00190773	0.0151537
ENSG00000269720.1	1	BLCA	0.0285302
ENSG00000240571.1	1	BLCA	0.0233591
ENSG00000267280.1	1	BLCA	0.0175939
ENSG00000240541.2	2	BLCA,LUSC	0.00561219	0.00848492
ENSG00000230084.1	1	BLCA	0.0497655
ENSG00000261101.1	1	BLCA	0.0393587
ENSG00000262772.1	1	BRCA	0.0306304
ENSG00000236830.2	1	BRCA	0.0200493
ENSG00000244265.1	1	BRCA	0.0092803
ENSG00000235499.1	2	BRCA,KIRC	0.0121524	0.0453618
ENSG00000267701.1	1	BRCA	0.00971267
ENSG00000224842.2	1	BRCA	0.0172234
ENSG00000223969.1	1	BRCA	0.0466359
ENSG00000253973.2	1	BRCA	0.032955
ENSG00000180769.4	1	BRCA	0.0261651
ENSG00000247228.2	1	BRCA	0.00310991
ENSG00000234459.1	1	BRCA	0.00717925
ENSG00000265752.2	1	BRCA	0.034172
ENSG00000260992.1	1	THCA	0.00688186
ENSG00000270000.1	1	THCA	0.00257608
ENSG00000223813.2	1	THCA	0.0306892
ENSG00000186615.6	2	HNSC,LUSC	0.00641406	0.0167193
ENSG00000258682.1	1	HNSC	0.0370023
ENSG00000262136.1	1	HNSC	0.0212823
ENSG00000234155.1	2	HNSC,LUAD	0.00296683	0.0251585
ENSG00000224387.1	1	HNSC	0.0143839
ENSG00000235609.4	1	HNSC	0.0230559
ENSG00000229325.1	1	HNSC	0.00241055
ENSG00000267121.1	2	HNSC,KIRC	0.0423487	0.000180204
ENSG00000254910.1	2	HNSC,KIRC	0.0136022	0.0448351
ENSG00000215908.5	1	HNSC	0.0345241
ENSG00000229656.2	1	HNSC	0.0381006
ENSG00000269737.1	1	HNSC	0.0353808
ENSG00000227039.2	2	HNSC,KIRC	0.0241428	0.00315309
ENSG00000237813.3	1	HNSC	0.00447962
ENSG00000237819.1	1	HNSC	0.0123829
ENSG00000228126.1	1	HNSC	0.031619
ENSG00000260711.1	1	HNSC	0.0450406
ENSG00000205890.3	1	HNSC	0.0148221
ENSG00000231993.1	1	HNSC	0.000240944
ENSG00000267750.1	1	KICH	0.0121239
ENSG00000259953.1	1	KICH	0.00829163
ENSG00000259036.1	1	KICH	0.00101643
ENSG00000225684.3	1	KICH	0.00526725
ENSG00000251396.2	1	KICH	0.00856939
ENSG00000262879.1	1	KICH	0.0129751
ENSG00000231507.1	1	KICH	0.0480904
ENSG00000183535.5	1	KICH	0.0309202
ENSG00000246792.2	1	KICH	0.00292318
ENSG00000261758.1	1	KICH	0.0134653
ENSG00000269640.1	1	KIRC	0.0167667
ENSG00000261971.2	1	KIRC	0.0254441
ENSG00000261051.1	1	KIRC	0.000279546
ENSG00000247317.3	1	KIRC	0.0456774
ENSG00000231107.1	1	KIRC	0.0236121
ENSG00000267244.1	1	KIRC	0.0006292
ENSG00000267838.1	2	KIRC,LUSC	0.000522367	0.0400091
ENSG00000249835.2	1	KIRC	0.000405679
ENSG00000227533.1	1	KIRC	0.0447857
ENSG00000229162.1	1	KIRC	0.00149128
ENSG00000270189.1	1	KIRC	0.00324013
ENSG00000262769.1	1	KIRC	0.0391205
ENSG00000226332.2	2	KIRC,LIHC	0.0290032	0.0366474
ENSG00000263345.1	1	KIRC	0.00056719
ENSG00000227279.1	1	KIRC	0.00828739
ENSG00000231652.2	1	KIRC	0.0282191
ENSG00000196421.3	1	KIRC	0.00638877
ENSG00000266767.1	1	KIRC	0.000607012
ENSG00000269867.1	1	KIRC	0.00102418
ENSG00000240731.1	1	KIRC	0.0275869
ENSG00000260145.1	1	KIRC	1.34e-06
ENSG00000238260.1	1	KIRC	0.0245448
ENSG00000226648.1	1	KIRC	0.00578633
ENSG00000235770.1	2	KIRC,KIRP	1.57729e-05	0.0260605
ENSG00000254419.1	1	KIRC	0.000134421
ENSG00000255176.1	1	KIRC	0.0025461
ENSG00000255750.1	1	KIRC	0.0432496
ENSG00000229180.4	1	KIRC	0.00816621
ENSG00000260910.1	1	KIRC	0.00271493
ENSG00000264469.1	1	KIRC	0.0249982
ENSG00000235033.3	1	KIRC	0.004433
ENSG00000255031.1	1	KIRC	0.00648775
ENSG00000231948.2	1	KIRC	5.69e-05
ENSG00000206417.4	1	KIRC	0.0282309
ENSG00000231064.1	1	KIRC	0.000223193
ENSG00000234869.1	1	KIRC	3.85e-07
ENSG00000255343.1	1	KIRC	0.00119024
ENSG00000257681.1	1	KIRC	0.0145186
ENSG00000267325.1	1	KIRC	0.0264742
ENSG00000248429.1	1	KIRC	0.0173683
ENSG00000261117.1	1	KIRC	0.00527477
ENSG00000223485.1	2	KIRC,LUAD	0.00499471	0.00106099
ENSG00000268836.1	1	KIRC	0.012557
ENSG00000230234.1	1	KIRC	0.0123123
ENSG00000256940.1	1	KIRC	3.98e-05
ENSG00000249695.2	1	KIRC	5.3e-05
ENSG00000261039.1	1	KIRC	0.000195516
ENSG00000248866.1	1	KIRC	0.00422421
ENSG00000261634.2	1	KIRC	0.000254837
ENSG00000250885.1	1	KIRC	0.000280108
ENSG00000260065.1	1	KIRC	0.0339987
ENSG00000204934.6	1	KIRC	0.0266039
ENSG00000229847.4	1	KIRC	0.000128196
ENSG00000267414.1	2	KIRC,KIRP	0.00811176	0.0331703
ENSG00000237188.3	1	KIRC	0.00466493
ENSG00000247081.3	1	KIRC	0.002336
ENSG00000231170.1	1	KIRC	0.000538928
ENSG00000228412.2	1	KIRC	0.0380014
ENSG00000228598.1	1	KIRC	0.042578
ENSG00000246022.2	1	KIRC	0.00325206
ENSG00000226496.1	1	KIRC	2.99e-05
ENSG00000261578.1	3	KIRC,KIRP,LUAD	0.000524474	0.00874045	0.0297043
ENSG00000225953.2	1	KIRP	0.00109829
ENSG00000250133.2	1	KIRP	0.0109857
ENSG00000242861.1	1	KIRP	0.0450688
ENSG00000245857.2	1	KIRP	0.0373196
ENSG00000255082.1	1	KIRP	0.0125982
ENSG00000259275.1	1	KIRP	0.0117467
ENSG00000241158.2	1	KIRP	0.00389395
ENSG00000253187.2	1	KIRP	0.00332503
ENSG00000224318.1	1	KIRP	0.0149191
ENSG00000248554.1	1	KIRP	0.0302122
ENSG00000229233.1	2	KIRP,LUAD	0.0089841	0.0237843
ENSG00000259476.1	1	KIRP	0.0224963
ENSG00000223855.1	1	KIRP	0.0486567
ENSG00000247131.1	1	KIRP	0.0115976
ENSG00000261888.1	1	KIRP	0.0389377
ENSG00000237989.1	1	KIRP	0.0144581
ENSG00000246263.2	1	LIHC	0.00666376
ENSG00000198221.7	1	LIHC	0.0195613
ENSG00000257086.1	1	LUAD	0.0347741
ENSG00000203288.3	1	LUAD	0.0437255
ENSG00000250230.2	1	LUAD	0.0234703
ENSG00000257671.1	1	LUAD	0.0169587
ENSG00000188660.3	1	LUAD	0.0349748
ENSG00000232034.1	1	LUAD	0.00912789
ENSG00000185186.4	1	LUAD	0.00245044
ENSG00000256204.1	1	LUAD	0.0357845
ENSG00000245281.2	1	LUAD	0.019865
ENSG00000227704.1	1	LUSC	0.028975
ENSG00000228989.1	1	LUSC	0.0455607
ENSG00000235954.2	1	LUSC	0.0265845
ENSG00000271659.1	1	LUSC	0.0348435
ENSG00000251259.1	1	LUSC	0.00650188
ENSG00000240050.1	1	LUSC	0.0204254
ENSG00000264456.1	1	LUSC	0.0498356
ENSG00000269653.1	1	LUSC	0.0068792
ENSG00000262652.1	1	LUSC	0.0165907
ENSG00000229167.1	1	LUSC	0.00164308
ENSG00000259442.1	1	LUSC	0.0280487
ENSG00000260787.1	1	LUSC	0.0400935
ENSG00000261355.1	1	LUSC	0.0347447
ENSG00000267904.1	1	LUSC	0.00841348
ENSG00000268087.1	1	LUSC	0.00219573

## Sheet: Table S14
Table S14 Prognosis-related NRlncs across 10 cancer types
lncRNA	number	Cancer Type	P Value
ENSG00000263931.1	1	BLCA	0.0439827
ENSG00000255045.1	1	BLCA	0.0134524
ENSG00000224614.1	1	BLCA	0.00113913
ENSG00000271778.1	1	BLCA	0.00342521
ENSG00000223884.1	1	BLCA	0.0230144
ENSG00000273009.1	1	BLCA	0.0246072
ENSG00000267344.1	1	BLCA	0.0409795
ENSG00000262772.1	2	BLCA,KIRC	0.0193435	0.0157549
ENSG00000272141.1	1	BLCA	0.0198702
ENSG00000244265.1	2	BLCA,LUSC	0.0392652	0.0350351
ENSG00000272761.1	1	BLCA	0.0288477
ENSG00000254810.1	1	BLCA	0.0390705
ENSG00000203499.6	1	BRCA	0.0308492
ENSG00000230838.1	1	BRCA	0.0199497
ENSG00000253973.2	2	BRCA,KIRC	8.25321e-05	0.0003146
ENSG00000272472.1	1	BRCA	0.0448645
ENSG00000247228.2	3	BRCA,HNSC,LUSC	0.0197739	0.00786974	0.00133103
ENSG00000249379.1	1	BRCA	0.00155021
ENSG00000237525.2	1	THCA	0.000150369
ENSG00000260992.1	3	THCA,KIRC,KIRP	0.0361056	5.84871e-06	0.0267109
ENSG00000256969.1	1	THCA	0.024901
ENSG00000230918.1	1	THCA	0.00037194
ENSG00000186615.6	2	THCA,KIRC	0.0442165	0.0192075
ENSG00000260577.1	1	THCA	0.0100826
ENSG00000237594.2	1	THCA	0.0481333
ENSG00000197670.5	1	THCA	0.0459119
ENSG00000233532.1	1	HNSC	0.000184396
ENSG00000273486.1	1	HNSC	0.00526466
ENSG00000273137.1	1	HNSC	0.00185913
ENSG00000254417.1	1	HNSC	0.0133069
ENSG00000231868.1	1	HNSC	0.00472595
ENSG00000232298.2	1	HNSC	0.0263298
ENSG00000217258.2	1	HNSC	0.00634527
ENSG00000237870.2	1	HNSC	0.00401064
ENSG00000225969.1	1	HNSC	0.0256345
ENSG00000223863.1	1	HNSC	0.0409553
ENSG00000271420.1	1	HNSC	0.00467072
ENSG00000267045.1	1	KICH	0.0356503
ENSG00000260711.1	2	KICH,KIRP	0.0314608	0.0097853
ENSG00000237934.1	1	KICH	0.00902352
ENSG00000213994.3	1	KICH	0.000947731
ENSG00000267750.1	2	KIRC,KIRP	0.00672016	0.0452519
ENSG00000269652.1	1	KIRC	0.0324334
ENSG00000245667.2	1	KIRC	0.00102941
ENSG00000225684.3	2	KIRC,KIRP	0.0411428	0.0257523
ENSG00000261207.1	1	KIRC	0.0257177
ENSG00000249167.1	1	KIRC	0.00171
ENSG00000269873.1	1	KIRC	0.000478064
ENSG00000254654.1	1	KIRC	0.000437557
ENSG00000225378.1	1	KIRC	0.0112992
ENSG00000261170.1	1	KIRC	0.00185719
ENSG00000257270.1	1	KIRC	0.00730669
ENSG00000256195.2	1	KIRC	0.0445393
ENSG00000231964.1	1	KIRC	0.00102989
ENSG00000225613.2	1	KIRC	0.00227718
ENSG00000255774.1	1	KIRC	9.9647e-07
ENSG00000260853.1	1	KIRC	0.0187624
ENSG00000233627.2	1	KIRC	0.0274885
ENSG00000260940.1	1	KIRC	0.0128949
ENSG00000236022.2	1	KIRC	0.00935492
ENSG00000234793.1	1	KIRC	0.00217971
ENSG00000271959.1	1	KIRC	0.00140167
ENSG00000273112.1	1	KIRC	0.0410937
ENSG00000237410.1	1	KIRC	0.0495313
ENSG00000261416.1	1	KIRC	0.0111421
ENSG00000230197.2	1	KIRC	0.0318522
ENSG00000237234.2	1	KIRC	0.00416468
ENSG00000248319.1	1	KIRC	0.00358064
ENSG00000272373.1	1	KIRC	0.00843782
ENSG00000229491.1	1	KIRC	0.0371384
ENSG00000273188.1	1	KIRC	0.00238772
ENSG00000236540.3	1	KIRC	0.00135651
ENSG00000238260.1	2	KIRC,LIHC	6.59302e-07	0.00277798
ENSG00000226648.1	2	KIRC,KIRP	2.87175e-05	0.0273646
ENSG00000235770.1	2	KIRC,LIHC	4.33695e-07	0.00105622
ENSG00000268812.2	1	KIRC	0.000399214
ENSG00000225938.1	1	KIRC	3.44391e-06
ENSG00000241679.2	1	KIRC	0.0459428
ENSG00000250012.1	1	KIRC	0.000325488
ENSG00000272129.1	1	KIRC	0.0147153
ENSG00000260173.1	1	KIRC	0.00965302
ENSG00000256139.2	1	KIRC	0.000190543
ENSG00000225376.1	1	KIRC	0.00028078
ENSG00000258114.1	1	KIRC	9.38408e-08
ENSG00000251448.1	1	KIRC	0.000268709
ENSG00000272695.1	1	KIRC	0.00928775
ENSG00000248092.3	1	KIRC	0.00864317
ENSG00000224958.1	1	KIRC	0.0238385
ENSG00000234452.1	1	KIRC	0.0103851
ENSG00000261238.1	1	KIRC	0.00602997
ENSG00000228401.3	1	KIRC	0.00810278
ENSG00000235782.1	1	KIRC	0.0109829
ENSG00000273117.1	1	KIRC	0.0025192
ENSG00000225342.1	1	KIRP	0.00818564
ENSG00000256164.1	1	KIRP	0.00785679
ENSG00000260163.1	1	KIRP	0.0203668
ENSG00000233766.3	1	KIRP	0.0259098
ENSG00000250786.1	1	KIRP	0.0255426
ENSG00000243081.2	1	KIRP	0.00169078
ENSG00000264026.1	1	KIRP	0.0242963
ENSG00000260634.1	1	KIRP	0.0115382
ENSG00000262890.1	1	KIRP	0.00904835
ENSG00000227502.2	1	KIRP	0.0281186
ENSG00000229873.1	1	KIRP	0.0231604
ENSG00000229380.1	1	KIRP	0.0324095
ENSG00000237188.3	2	KIRP,LUAD	0.0350553	0.0374946
ENSG00000270091.1	1	KIRP	0.0291059
ENSG00000267480.1	1	KIRP	0.0123409
ENSG00000255118.1	1	KIRP	0.00308187
ENSG00000228598.1	2	KIRP,LUAD	0.00160661	0.0414277
ENSG00000260201.1	1	KIRP	0.0302169
ENSG00000228288.2	1	LIHC	0.00844911
ENSG00000232811.1	1	LUAD	0.0441827
ENSG00000226330.1	1	LUAD	0.0128206
ENSG00000261521.1	1	LUAD	0.000761329
ENSG00000262332.1	1	LUAD	0.0290455
ENSG00000228318.1	1	LUAD	0.027731
ENSG00000224843.2	1	LUAD	0.0148416
ENSG00000269289.1	1	LUAD	0.00133527
ENSG00000222032.1	1	LUAD	0.00896036
ENSG00000271948.1	1	LUAD	0.0473867
ENSG00000260581.1	1	LUSC	0.0485857
ENSG00000273190.1	1	LUSC	0.0135604
ENSG00000272931.1	1	LUSC	0.0429191
ENSG00000273181.1	1	LUSC	0.0275502
ENSG00000259475.1	1	LUSC	0.00902376
ENSG00000272555.1	1	LUSC	0.0457823
ENSG00000269427.1	1	LUSC	0.00453125
ENSG00000261469.1	1	LUSC	0.00490906
ENSG00000254162.1	1	LUSC	0.0299801
ENSG00000272933.1	1	LUSC	0.000175107
ENSG00000225963.3	1	LUSC	0.0294929
