# Supplementary material for: The characteristic landscape of lncRNAs classified by RBP–lncRNA interactions across 10 cancers
Source: Royal Society of Chemistry journal article supplement (doi:10.1039/c7mb00144d), 2017-03-31
Supplement: c7mb00144d2.pdf [file c7mb00144d2.pdf]

Table S1: The number of patient samples in each cancer.

| Cancer | Normal | Tumor |
|--------|--------|-------|
| BLCA   | 19     | 252   |
| BRCA   | 105    | 837   |
| HNSC   | 42     | 426   |
| LIHC   | 50     | 200   |
| LUAD   | 58     | 488   |
| LUSC   | 17     | 220   |
| KICH   | 25     | 66    |
| KIRC   | 67     | 448   |
| KIRP   | 30     | 198   |
| THCA   | 52     | 374   |

Table S2: The Wilcoxon rank-sum test p-values of expression between Rlncs and NRlncs in normal samples across 10 cancers.

| Cancer | P-value  |
|--------|----------|
| BLCA   | 6.90E-14 |
| BRCA   | 5.04E-18 |
| THCA   | 1.99E-20 |
| HNSC   | 2.94E-12 |
| KICH   | 1.11E-16 |
| KIRC   | 2.19E-20 |
| KIRP   | 2.83E-11 |
| LIHC   | 1.55E-1  |
| LUAD   | 2.72E-9  |
| LUSC   | 2.85E-12 |

Table S3: The Wilcoxon rank-sum test p-values of expression between Rlncs and NRlncs in tumor samples across 10 cancers.

| Cancer | P-value  |
|--------|----------|
| BLCA   | 5.30E-13 |
| BRCA   | 4.48E-19 |
| THCA   | 2.46E-19 |
| HNSC   | 8.13E-13 |
| KICH   | 6.36E-16 |
| KIRC   | 1.12E-22 |
| KIRP   | 7.72E-19 |
| LIHC   | 1.88E-6  |
| LUAD   | 3.16E-18 |
| LUSC   | 1.02E-24 |

Table S4: The Wilcoxon rank-sum test p-values of expression between differentially expressed Rlncs and NRlncs in tumor samples across 10 cancers.

| Cancer | P-value  |
|--------|----------|
| BLCA   | 1.53E-5  |
| BRCA   | 5.60E-8  |
| THCA   | 1.29E-9  |
| HNSC   | 1.07E-3  |
| KICH   | 1.80E-9  |
| KIRC   | 7.45E-13 |
| KIRP   | 3.07E-9  |
| LIHC   | 5.50E-8  |
| LUAD   | 8.89E-8  |
| LUSC   | 9.99E-17 |

Table S5: The Wilcoxon rank-sum test p-values of protein coding potential between differentially expressed Rlncs and NRlncs across 10 cancers.

| Cancer | P-value |
|--------|---------|
| BLCA   | 4.44E-3 |
| BRCA   | 7.46E-5 |
| THCA   | 1.01E-2 |
| HNSC   | 1.34E-2 |
| KICH   | 7.39E-4 |
| KIRC   | 3.86E-2 |
| KIRP   | 6.23E-3 |
| LIHC   | 1.77E-2 |
| LUAD   | 3.69E-4 |
| LUSC   | 3.69E-2 |

Table S6: The Wilcoxon rank-sum test p-values of evolutionary conservation scores between differentially expressed Rlncs and NRlncs across 10 cancers.

| Cancer | P-value |
|--------|---------|
| BLCA   | 1.30E-3 |
| BRCA   | 3.75E-5 |
| THCA   | 1.79E-4 |
| HNSC   | 2.27E-4 |
| KICH   | 1.03E-5 |
| KIRC   | 1.16E-5 |
| KIRP   | 2.65E-5 |
| LIHC   | 3.82E-4 |
| LUAD   | 2.85E-4 |
| LUSC   | 3.28E-6 |

Table S7: The number of neighboring protein-coding genes of the differentially expressed lncRNAs.

| Cancer | RInc | NRInc |
|--------|------|-------|
| BLCA   | 1857 | 1220  |
| BRCA   | 1884 | 1417  |
| THCA   | 1835 | 1366  |
| HNSC   | 1902 | 1326  |
| KICH   | 2457 | 1816  |
| KIRC   | 2704 | 2256  |
| KIRP   | 2120 | 1612  |
| LIHC   | 1948 | 1078  |
| LUAD   | 2205 | 1599  |
| LUSC   | 2468 | 1715  |

Table S8: The Wilcoxon rank-sum test p-values of expression between neighbor genes of differentially expressed RIncs and NRIncS across 10 cancers.

| Cancer | P-value |
|--------|---------|
| BLCA   | 1.57E-4 |
| BRCA   | 9.69E-2 |
| THCA   | 2.83E-2 |
| HNSC   | 1.02E-1 |
| KICH   | 6.31E-1 |
| KIRC   | 1.41E-1 |
| KIRP   | 1.56E-2 |
| LIHC   | 5.91E-1 |
| LUAD   | 3.09E-2 |
| LUSC   | 6.81E-3 |

Table S9: The Wilcoxon rank-sum test p-values of SNPs density between RIncs and NRIncS across 10 cancers.

| Cancer | P-value |
|--------|---------|
| BLCA   | 0.39    |
| BRCA   | 0.30    |
| THCA   | 0.32    |
| HNSC   | 0.50    |
| KICH   | 0.30    |
| KIRC   | 0.43    |
| KIRP   | 0.28    |
| LIHC   | 0.82    |
| LUAD   | 0.33    |
| LUSC   | 0.63    |

Table S10: The Wilcoxon rank-sum test p-values of SNPs density between differentially expressed Rlncs and NRlncs across 10 cancers.

| Cancer | P-value |
|--------|---------|
| BLCA   | 0.50    |
| BRCA   | 0.49    |
| THCA   | 0.31    |
| HNSC   | 0.38    |
| KICH   | 0.26    |
| KIRC   | 0.20    |
| KIRP   | 0.67    |
| LIHC   | 0.36    |
| LUAD   | 0.14    |
| LUSC   | 0.33    |

Table S15: The Wilcoxon rank-sum test p-values of ORF length between differentially expressed Rlncs and NRlncs across 10 cancers.

| Cancer | P-value  |
|--------|----------|
| BLCA   | 4.92E-6  |
| BRCA   | 4.74-E10 |
| THCA   | 1.81E-4  |
| HNSC   | 3.38E-3  |
| KICH   | 1.26E-5  |
| KIRC   | 1.48E-5  |
| KIRP   | 1.83E-6  |
| LIHC   | 7.04E-4  |
| LUAD   | 2.48E-11 |
| LUSC   | 5.18E-7  |

Table S16: The Wilcoxon rank-sum test p-values of sequence length between differentially expressed Rlncs and NRlncs across 10 cancers.

| Cancer | P-value  |
|--------|----------|
| BLCA   | 7.06E-12 |
| BRCA   | 2.81E-20 |
| THCA   | 1.28E-17 |
| HNSC   | 6.67E-14 |
| KICH   | 1.84E-21 |
| KIRC   | 6.50E-18 |
| KIRP   | 1.10E-15 |
| LIHC   | 2.79E-21 |
| LUAD   | 1.37E-25 |
| LUSC   | 6.44E-13 |

Figure S1

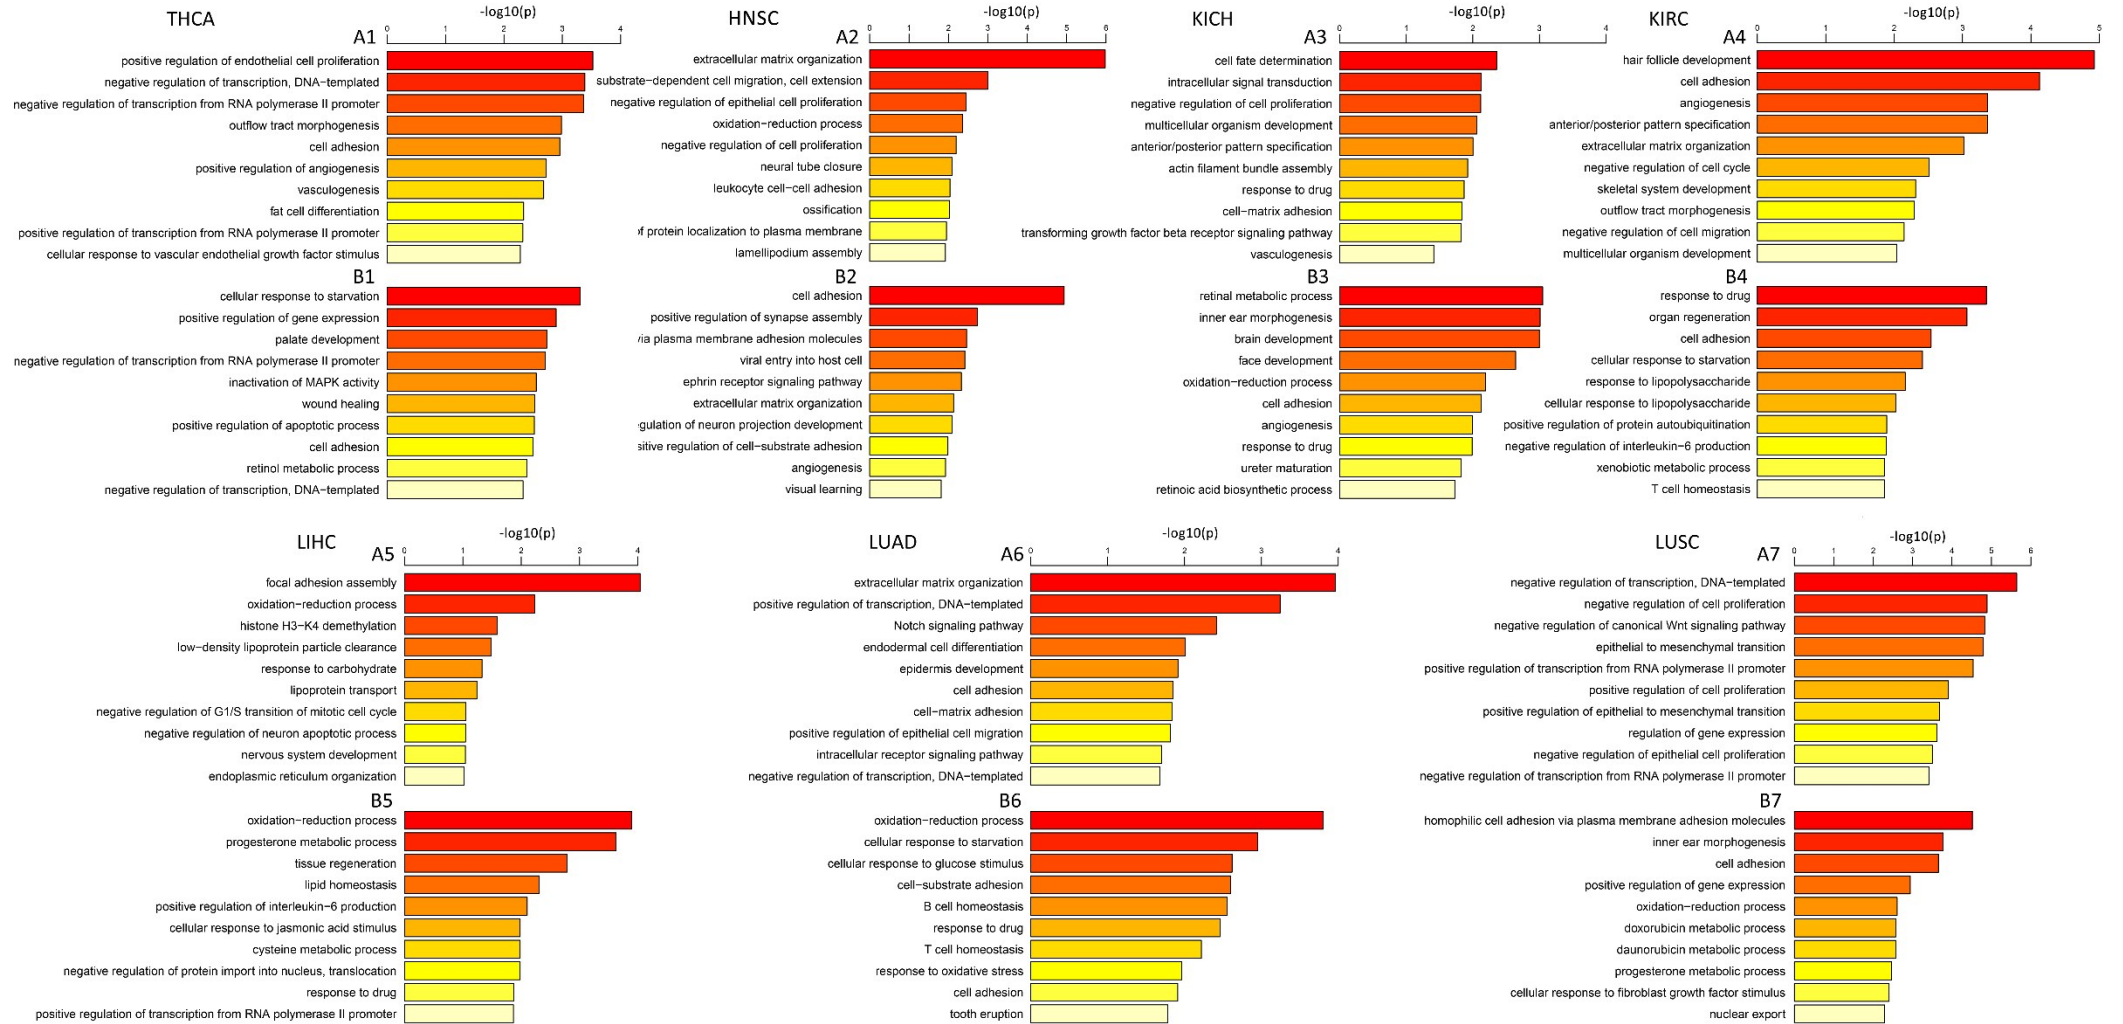

Figure S2

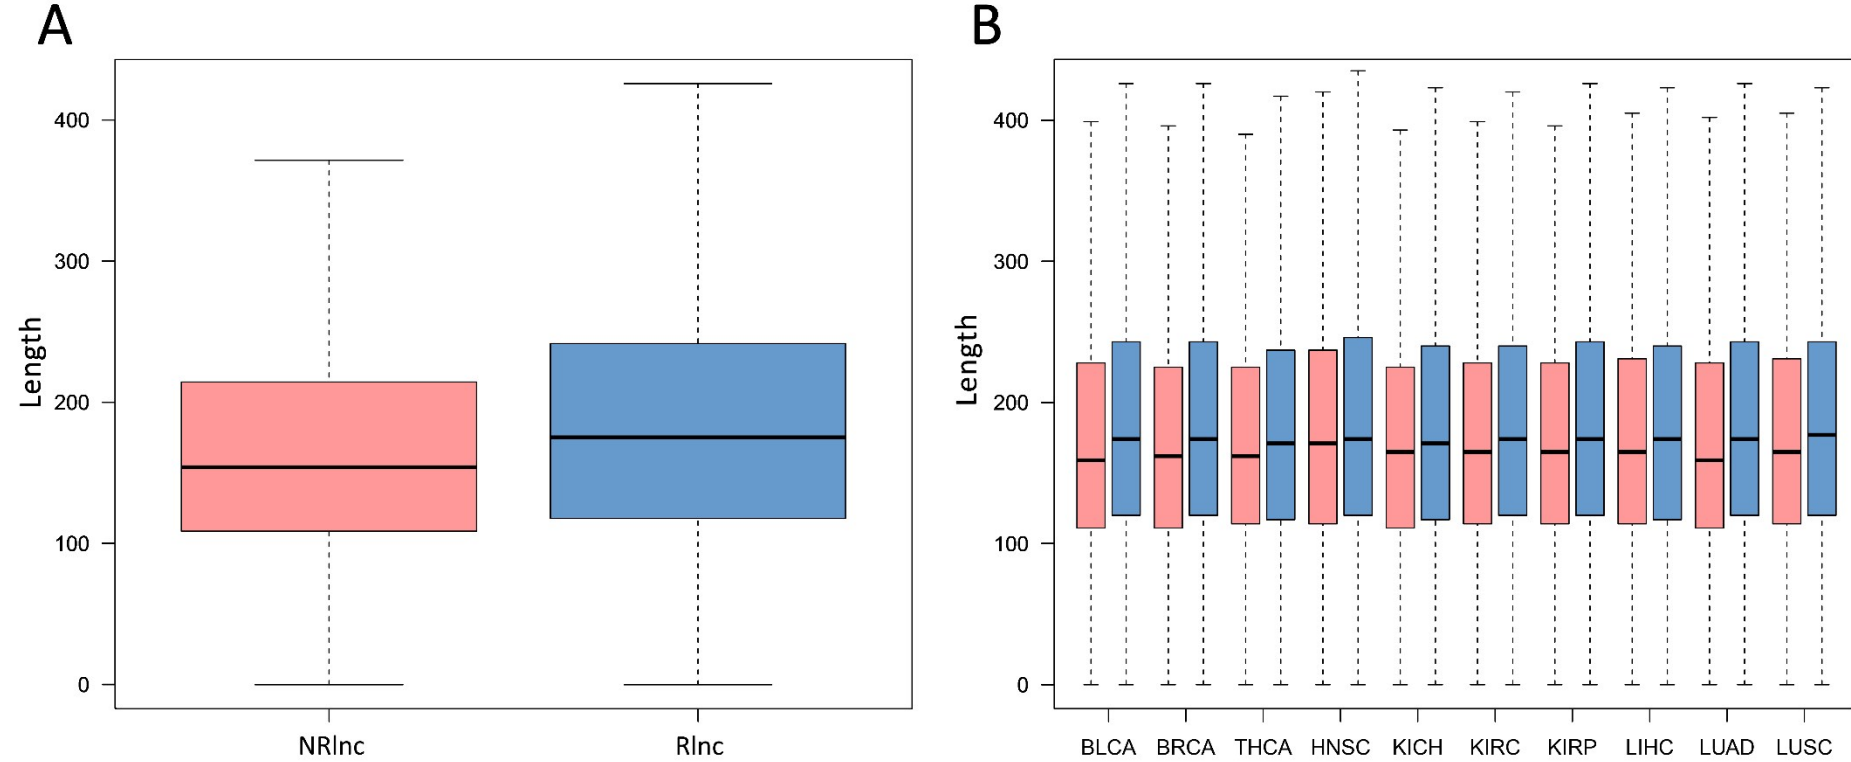

Figure S3

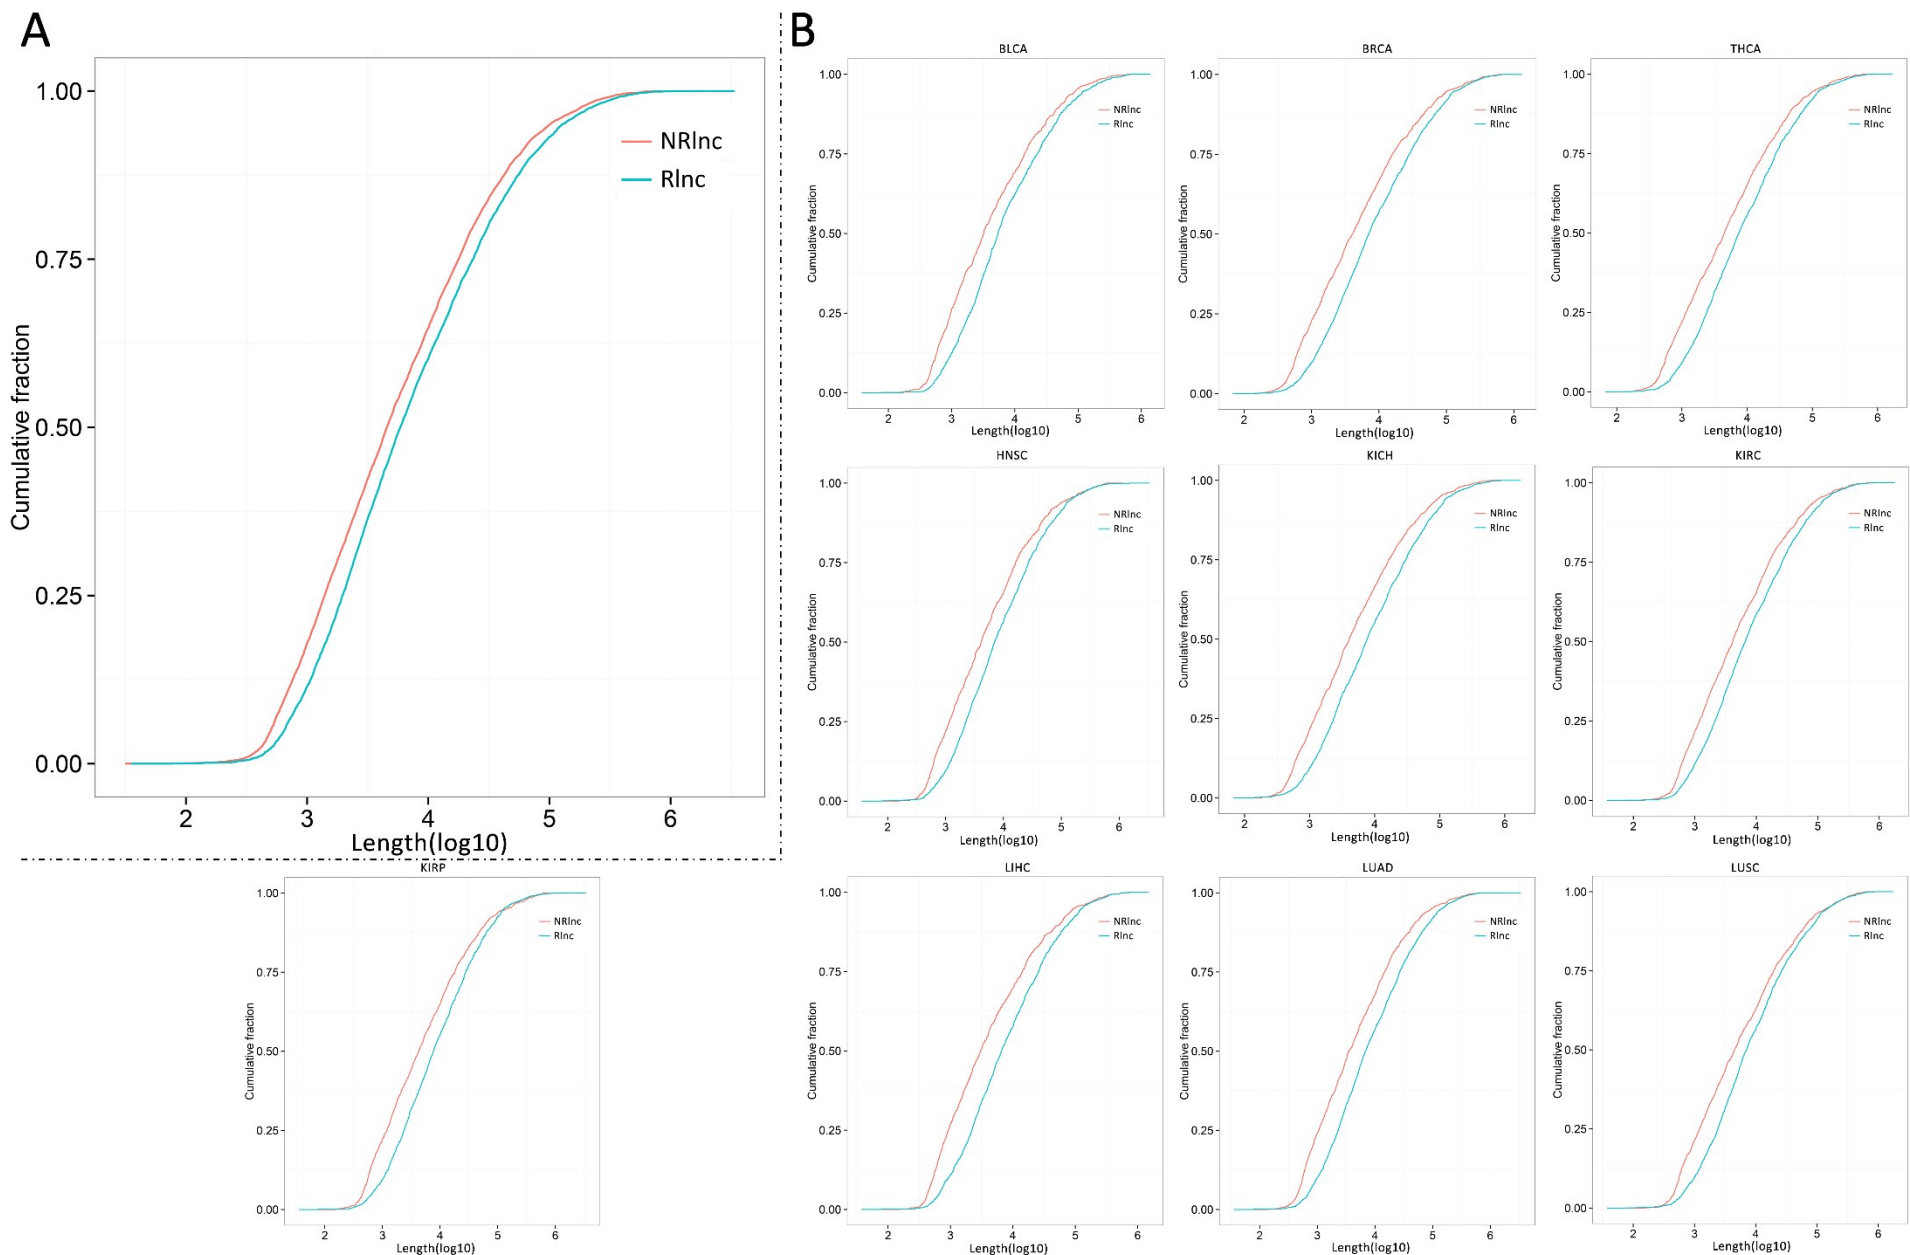

## Additional files

**Additional file 1: Fig. S1~S3.** Fig. S1: The function annotation of Rlncs and NRlncs. A1-A7 represent the top 10 functions of Rlncs in THCA, HNSC, KICH, KIRC, LIHC, LUAD and LUSC, respectively. B1-B7 represent the top 10 functions of NRlncs in THCA, HNSC, KICH, KIRC, LIHC, LUAD, LUSC, respectively; Fig. S2: The ORF length of lncRNAs. Blue represents Rlncs, red represents NRlncs. (A) The ORF length of Rlncs and NRlncs; (B) The ORF length of the differentially expressed lncRNAs in each cancer; Fig. S3: The length of lncRNAs sequences. Blue represents Rlncs, red represents NRlncs. (A) The sequence length of all lncRNAs. (B) The sequence length of lncRNAs that differentially expressed in each cancer. **Table S1~S10, S15, S16.** Table S1: The number of patient samples in each cancer; Table S2: The Wilcoxon rank-sum test p-values of expression between Rlncs and NRlncs in normal samples across 10 cancers; Table S3: The Wilcoxon rank-sum test p-values of expression between Rlncs and NRlncs in tumor samples across 10 cancers; Table S4: The Wilcoxon rank-sum test p-values of expression between differentially expressed Rlncs and NRlncs in tumor samples across 10 cancers; Table S5: The Wilcoxon rank-sum test p-values of protein coding potential between differentially expressed Rlncs and NRlncs across 10 cancers; Table S6: The Wilcoxon rank-sum test p-values of evolutionary conservation scores between differentially expressed Rlncs and NRlncs across 10 cancers; Table S7: The number of neighboring protein-coding genes of the differentially expressed lncRNAs; Table S8: The Wilcoxon rank-sum test p-values of expression between neighbor genes of differentially expressed Rlncs and NRlncs across 10 cancers; Table S9: The Wilcoxon rank-sum test p-values of SNPs density between Rlncs and NRlncs across 10 cancers; Table S10: The Wilcoxon rank-sum test p-values of SNPs density between differentially expressed Rlncs and NRlncs across 10 cancers; Table S15: The Wilcoxon rank-sum test p-values of ORF length between differentially expressed Rlncs and NRlncs across 10 cancers; Table S16: The Wilcoxon rank-sum test p-values of sequence length between differentially expressed Rlncs and NRlncs across 10 cancers. (.docx)

**Additional file 2: Table S11.** The KEGG pathway enrichment of Rlncs in THCA, HNSC, KICH, KIRC, LIHC, LUAD, LUSC. (.xlsx); **Table S12.** The KEGG pathway enrichment of NRlncs in THCA, HNSC, KICH, KIRC, LIHC, LUAD, LUSC. (.xlsx); **Table S13.** Prognosis-related Rlncs across 10 cancer types. (.xlsx); **Table S14.** Prognosis-related NRlncs across 10 cancer types. (.xlsx)
